# Supplementary material for: Streptomyces rugosispiralis sp. nov., a Novel Actinobacterium Isolated from Peat Swamp Forest Soil That Produces Ansamycin Derivatives and Nocardamines
Source: MDPI journal article supplement (doi:10.3390/antibiotics12091467), 2023-09-20

## Supplementary Materials

Figure S1.  $^1\text{H}$  NMR spectrum ( $\text{CDCl}_3$ ) of compound (1)

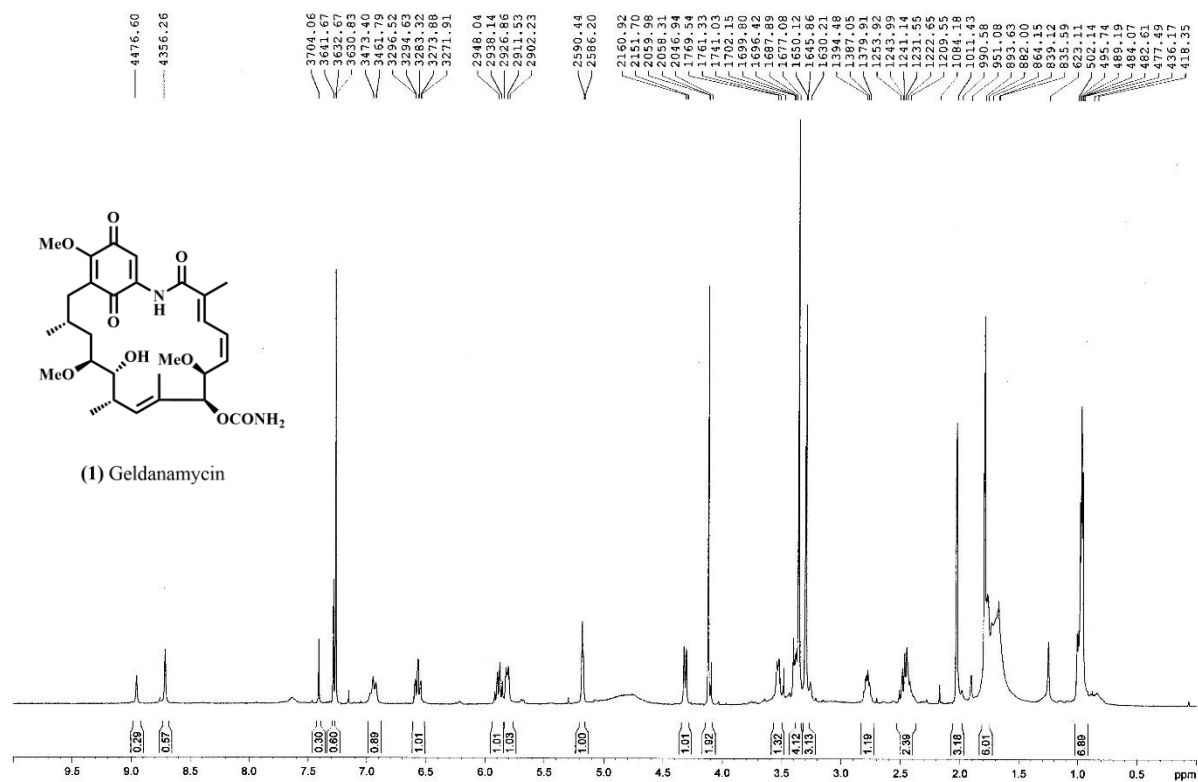

**Figure S2.**  $^{13}\text{C}$  NMR spectrum ( $\text{CDCl}_3$ ) of compound (**1**)

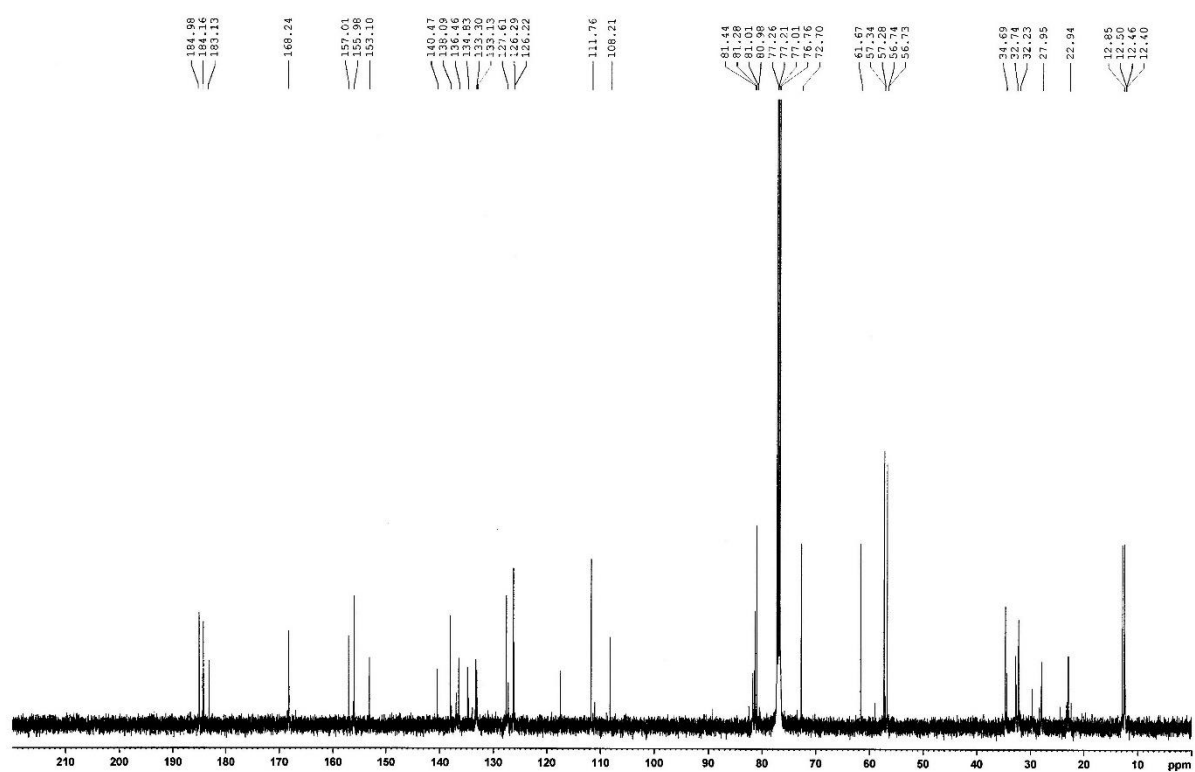

Figure S3.  $^1\text{H}$  NMR spectrum ( $\text{CDCl}_3$ ) of compound (2)

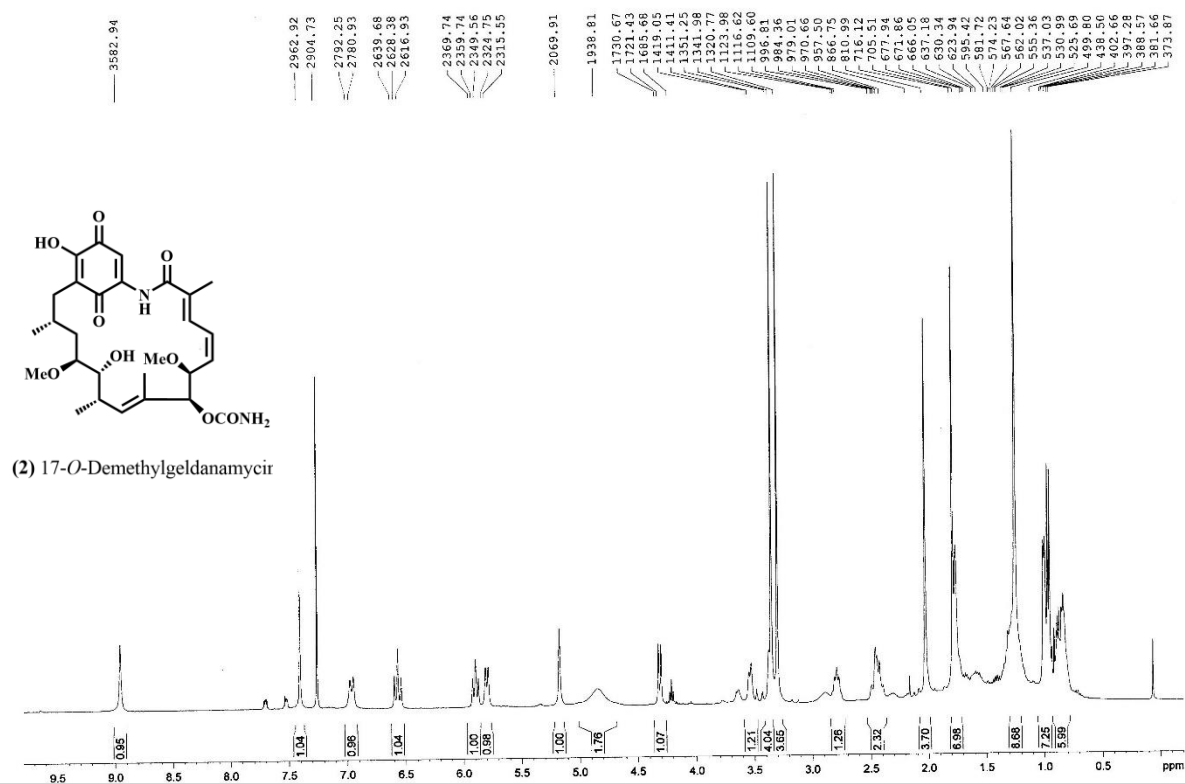

**Figure S4.**  $^{13}\text{C}$  NMR spectrum ( $\text{CDCl}_3$ ) of compound (**2**)

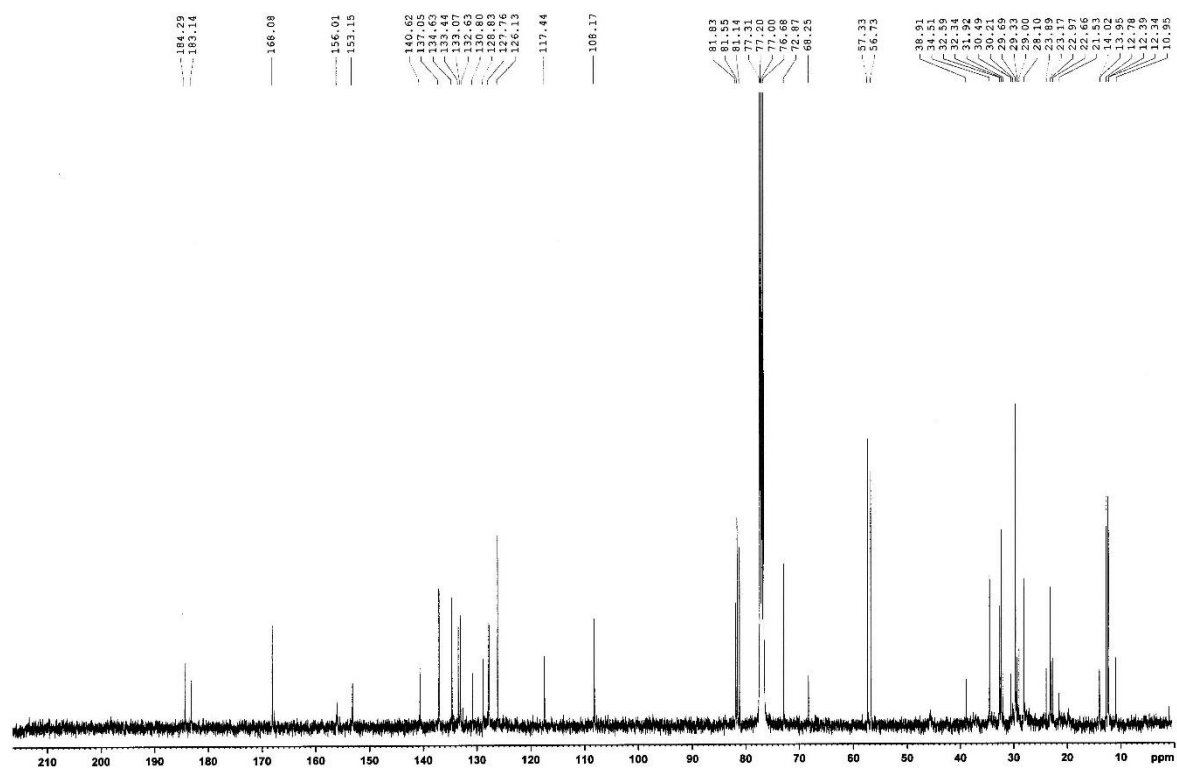

Figure S5.  $^1\text{H}$  NMR spectrum (DMSO- $d_6$ ) of compound (3)

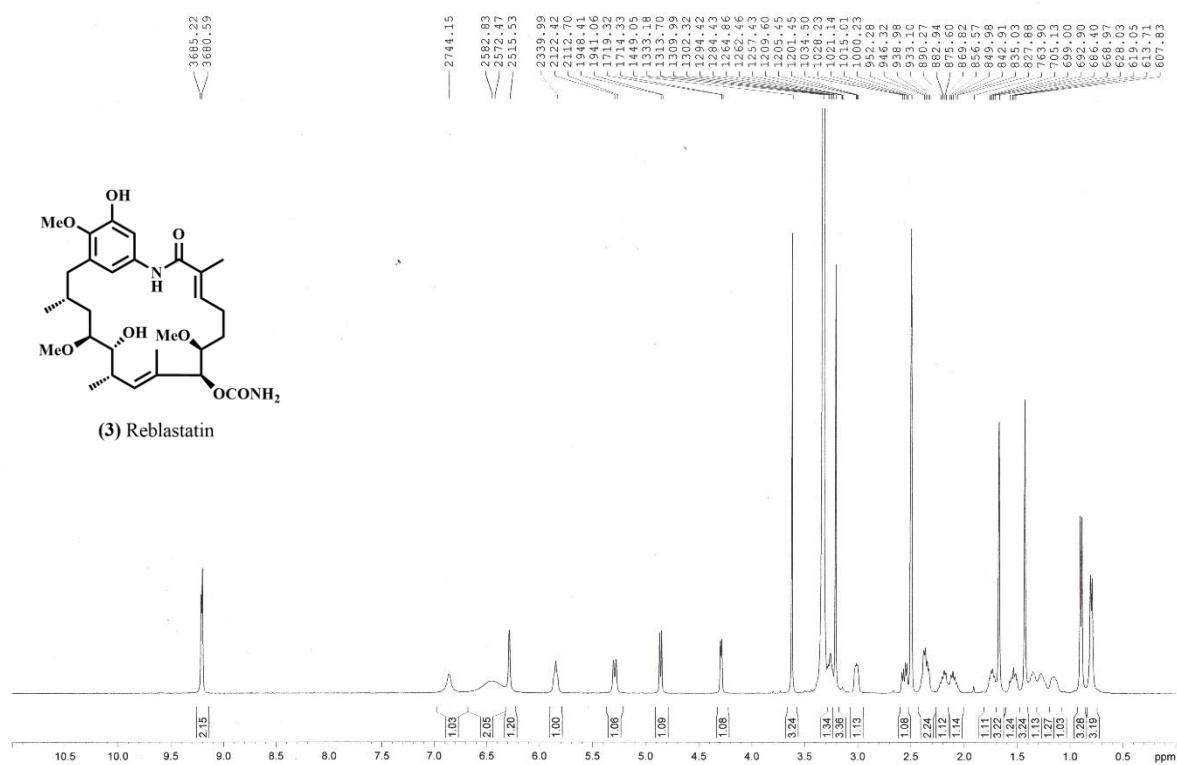

**Figure S6.**  $^{13}\text{C}$  NMR spectrum ( $\text{DMSO-}d_6$ ) of compound (**3**)

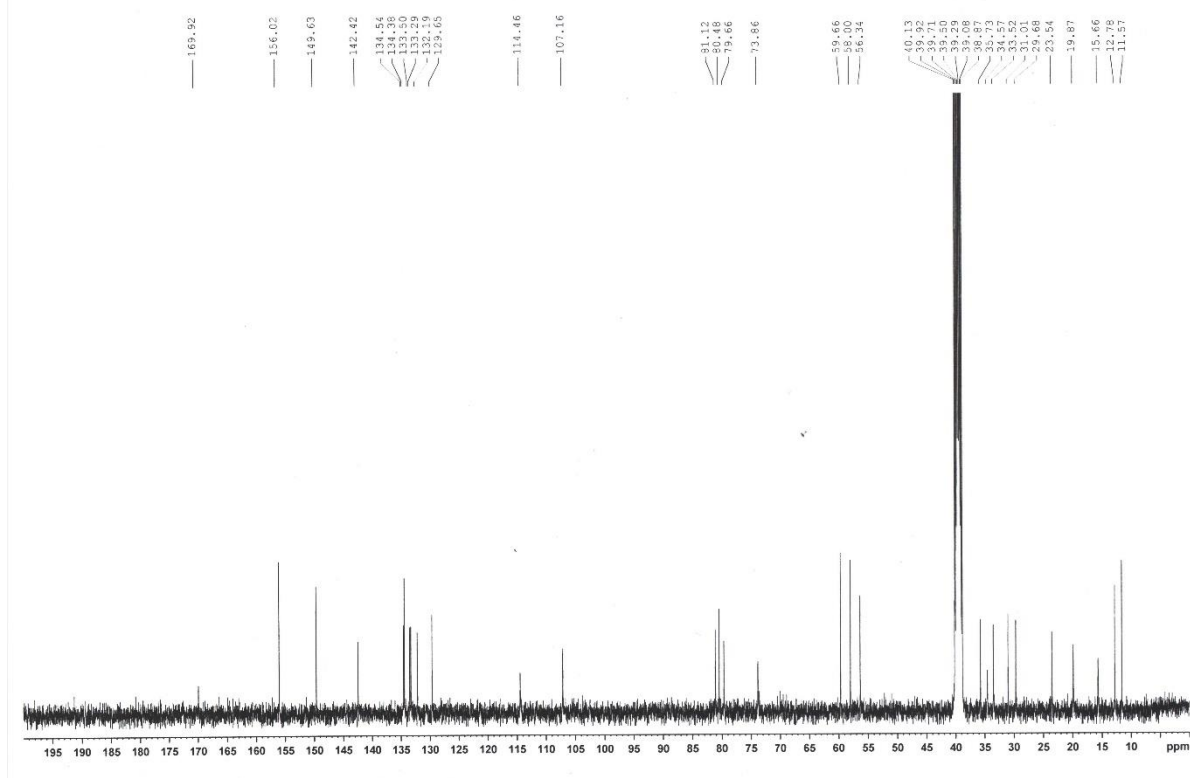

Figure S7.  $^1\text{H}$  NMR spectrum (DMSO- $d_6$ ) of compound (4)

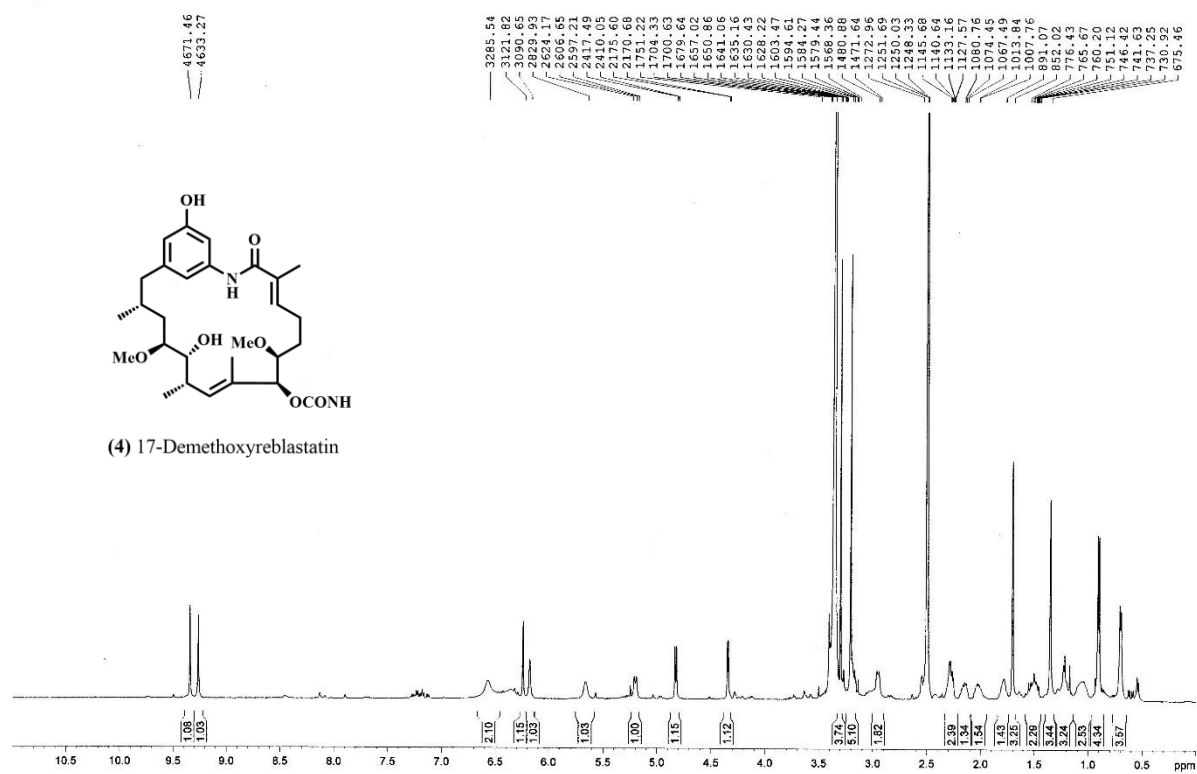

Figure S8.  $^{13}\text{C}$  NMR spectrum (DMSO- $d_6$ ) of compound (4)

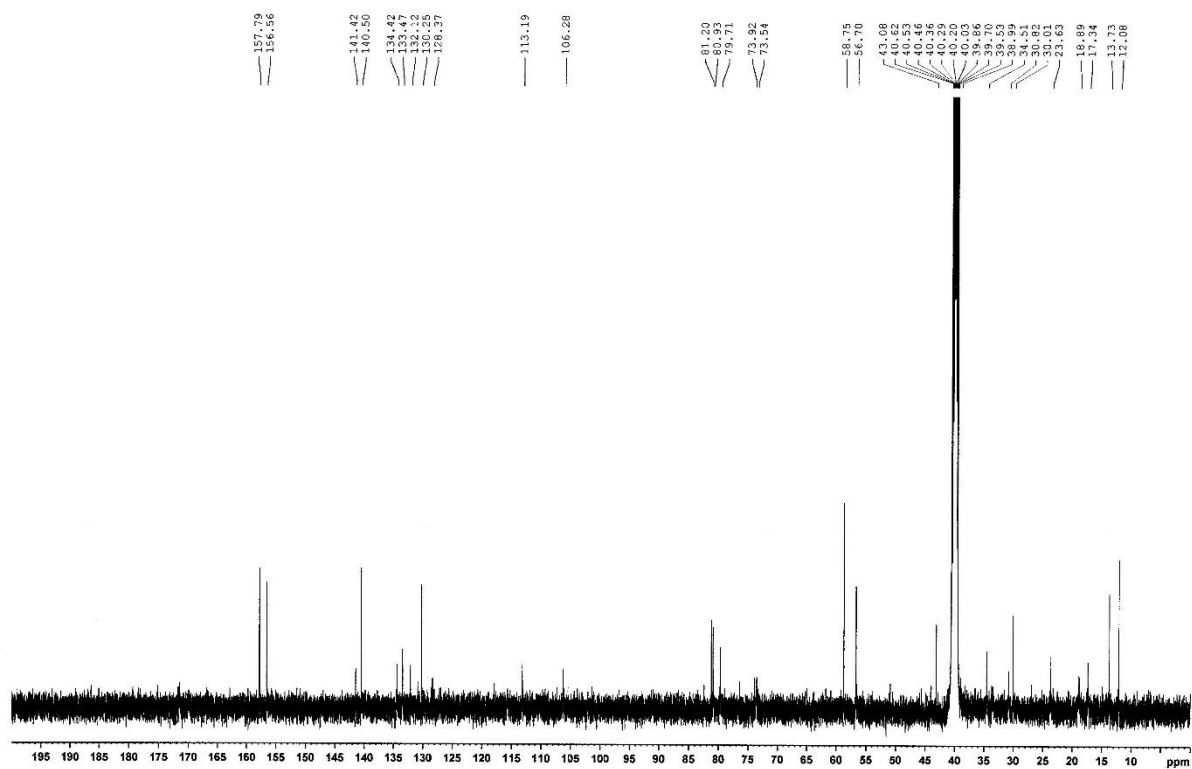



**Figure S9.**  $^1\text{H}$  NMR spectrum (DMSO- $d_6$ ) of compound (**5**)

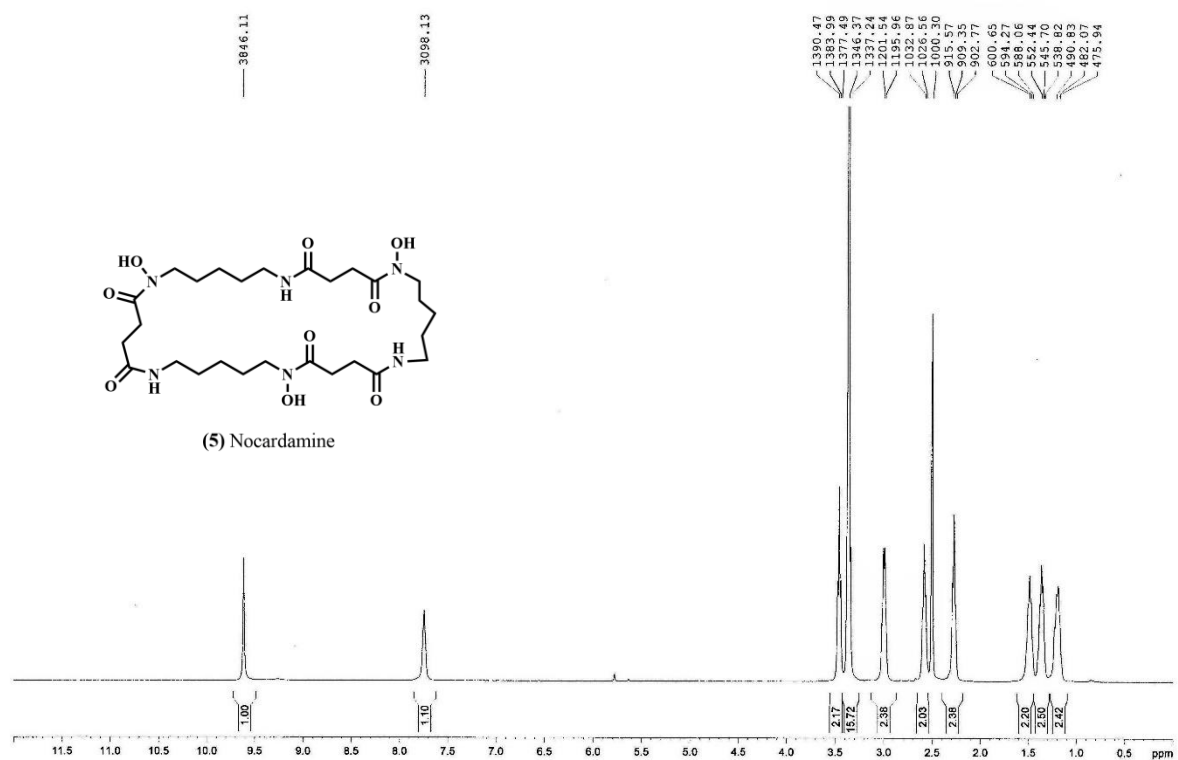

**Figure S10.**  $^{13}\text{C}$  NMR spectrum (DMSO- $d_6$ ) of compound (5)

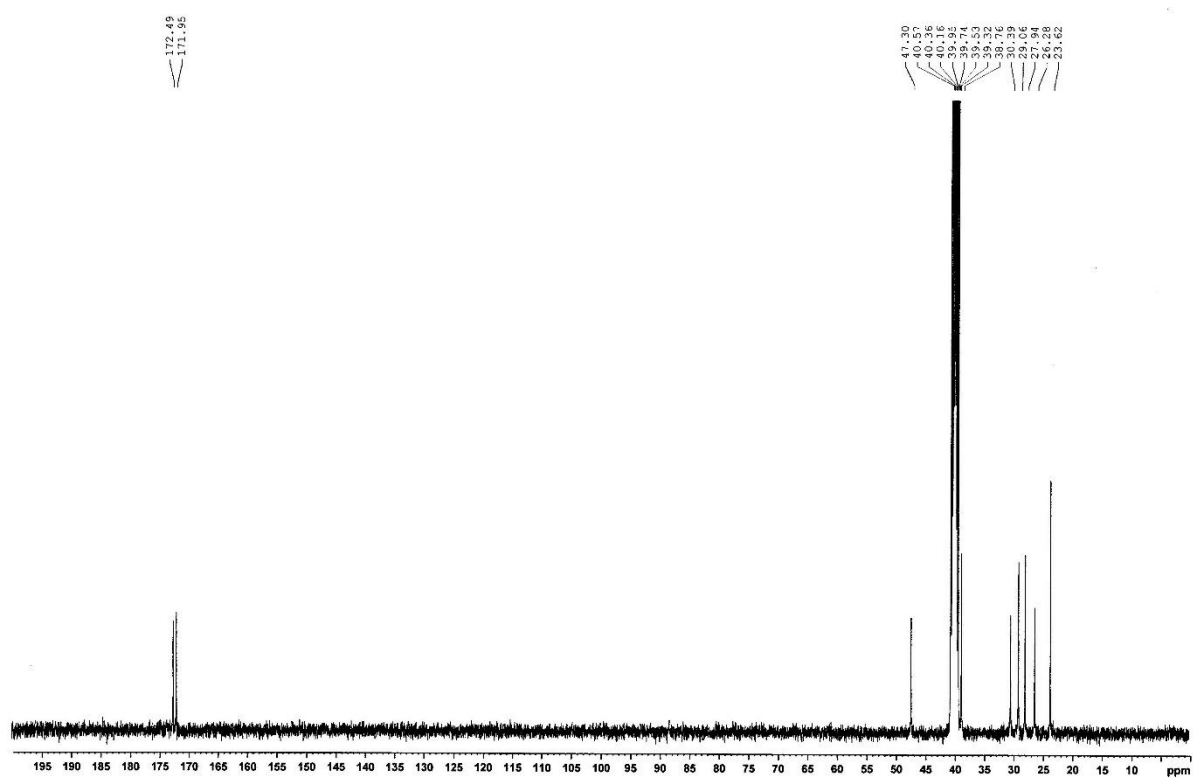

(6) Dehydroxynocardamine

The figure displays the chemical structure of Dehydroxynocardamine and its corresponding <sup>1</sup>H and <sup>13</sup>C NMR spectra. The chemical structure is a macrocyclic amide with a central chain of four amide bonds and two terminal hydroxyl groups. The <sup>1</sup>H NMR spectrum (bottom) shows peaks at 9.54 (0.42), 7.75 (1.00), 3.30 (2.52), 2.90 (1.14), 2.50 (2.52), 1.27 (1.27), 1.05 (2.38), and 0.99 (2.05) ppm. The <sup>13</sup>C NMR spectrum (top) shows peaks at 3854.17, 3099.82, 1382.89, 1388.30, 1265.13, 1185.77, 1186.45, 1033.69, 1000.37, 925.49, 910.46, 593.75, 305.85, 300.99, 484.22, and 479.19 ppm.

<sup>1</sup>H NMR (400 MHz, CDCl<sub>3</sub>) peaks (ppm): 9.54 (0.42), 7.75 (1.00), 3.30 (2.52), 2.90 (1.14), 2.50 (2.52), 1.27 (1.27), 1.05 (2.38), 0.99 (2.05).

<sup>13</sup>C NMR (100 MHz, CDCl<sub>3</sub>) peaks (ppm): 3854.17, 3099.82, 1382.89, 1388.30, 1265.13, 1185.77, 1186.45, 1033.69, 1000.37, 925.49, 910.46, 593.75, 305.85, 300.99, 484.22, 479.19.

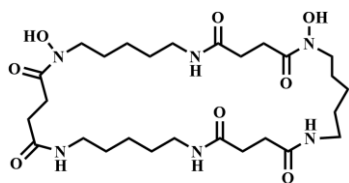

### (6) Dehydroxynocardamine

**Figure S12.**  $^{13}\text{C}$  NMR spectrum ( $\text{CDCl}_3$ ) of compound **(6)**

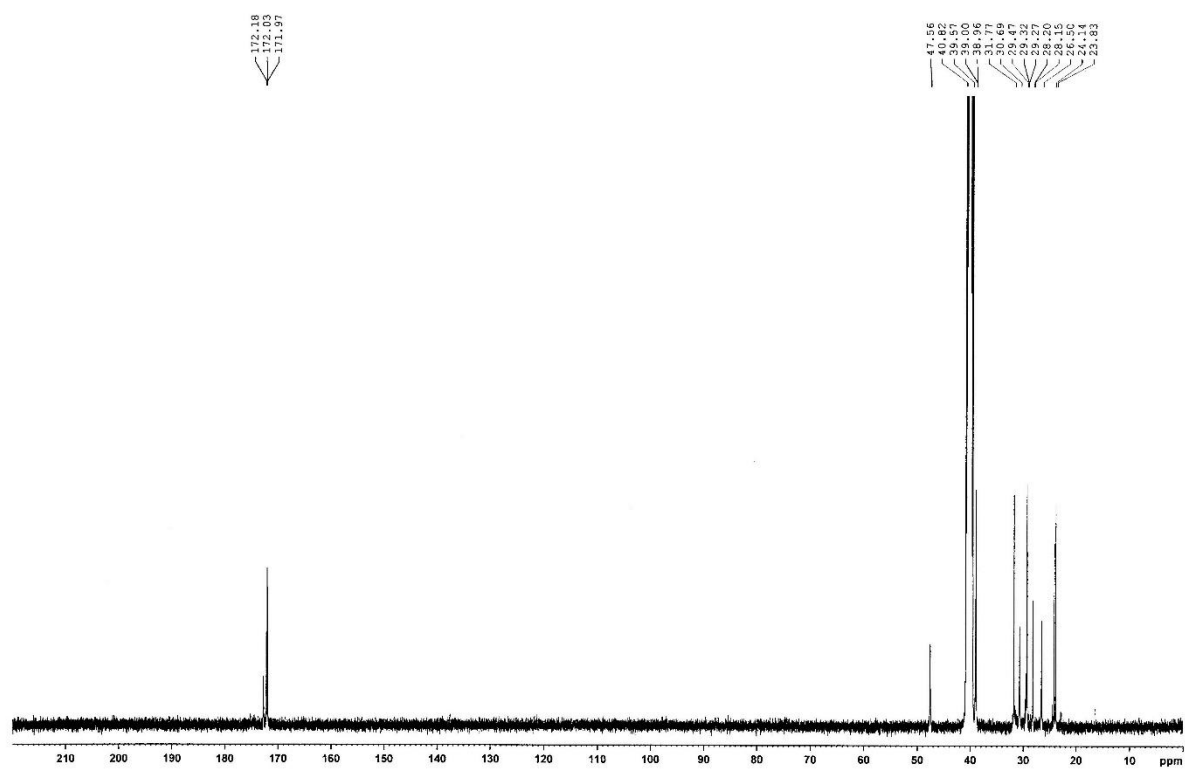

Figure S13. MS spectrum of compound (1)

Acquisition Parameter

|             |            |                      |          |                  |           |
|-------------|------------|----------------------|----------|------------------|-----------|
| Source Type | ESI        | Ion Polarity         | Negative | Set Nebulizer    | 0.4 Bar   |
| Focus       | Not active |                      |          | Set Dry Heater   | 200 °C    |
| Scan Begin  | 50 m/z     | Set Capillary        | 4500 V   | Set Dry Gas      | 5.0 l/min |
| Scan End    | 1500 m/z   | Set End Plate Offset | -500 V   | Set Divert Valve | Source    |

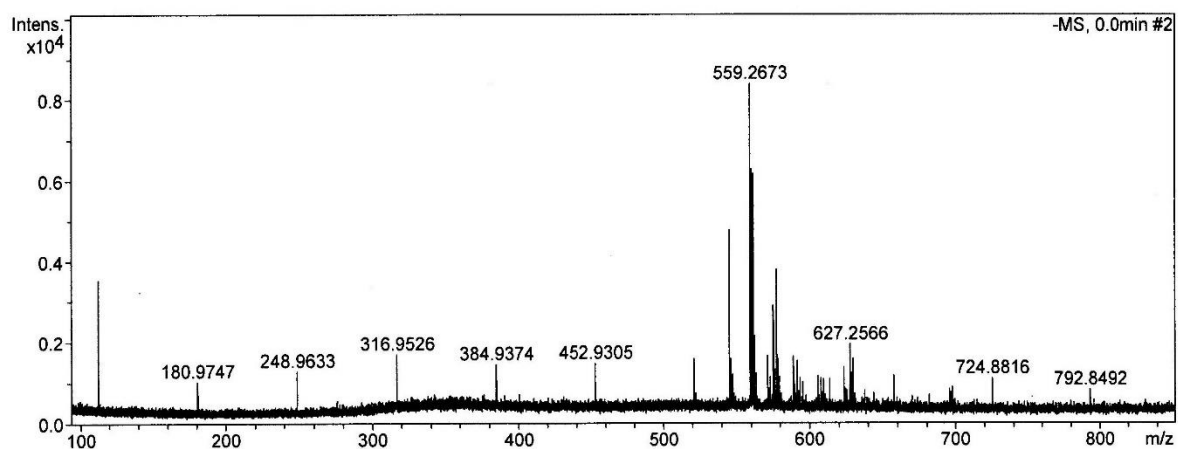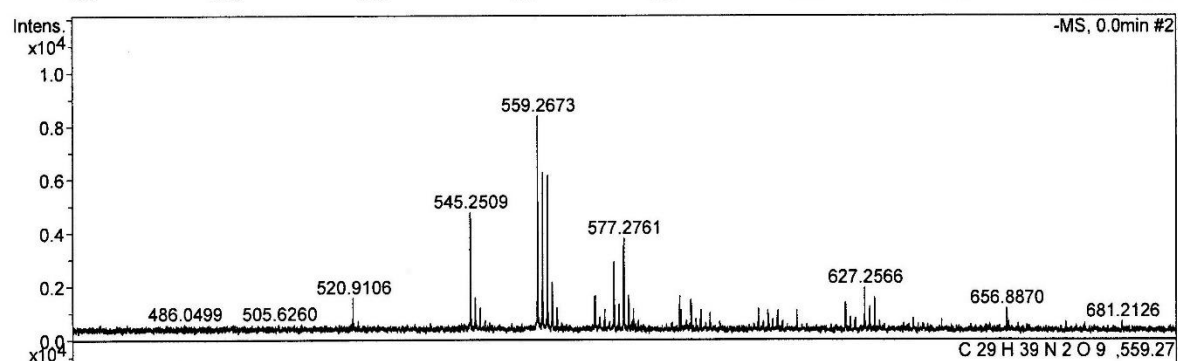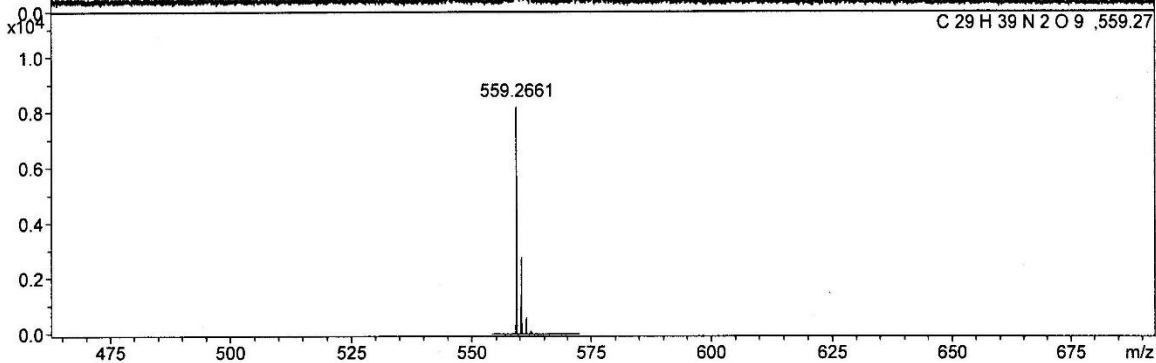

Figure S14. MS spectrum of compound (2)

| Acquisition Parameter |            |                      |          |                  |           |
|-----------------------|------------|----------------------|----------|------------------|-----------|
| Source Type           | ESI        | Ion Polarity         | Negative | Set Nebulizer    | 0.4 Bar   |
| Focus                 | Not active |                      |          | Set Dry Heater   | 200 ?C    |
| Scan Begin            | 50 m/z     | Set Capillary        | 4500 V   | Set Dry Gas      | 5.0 l/min |
| Scan End              | 1500 m/z   | Set End Plate Offset | -500 V   | Set Divert Valve | Source    |

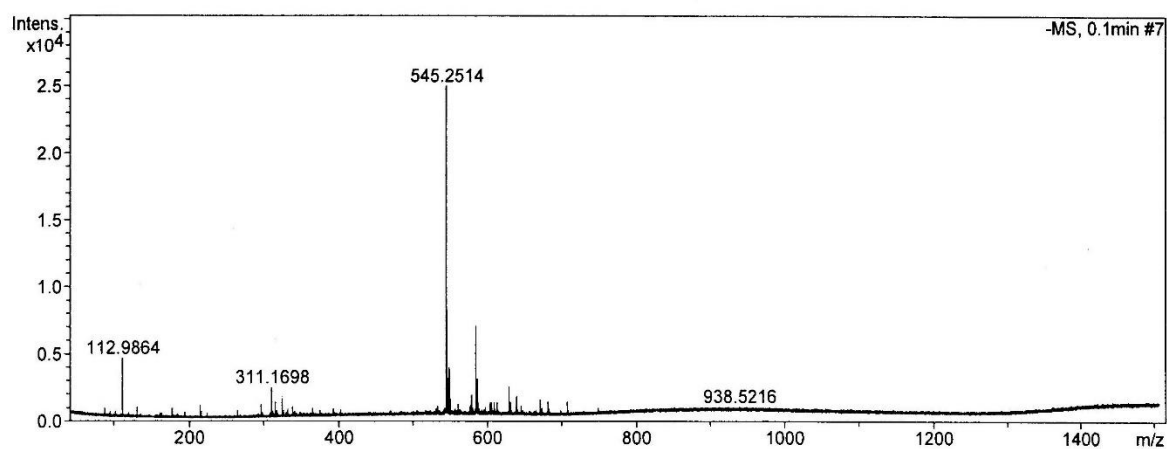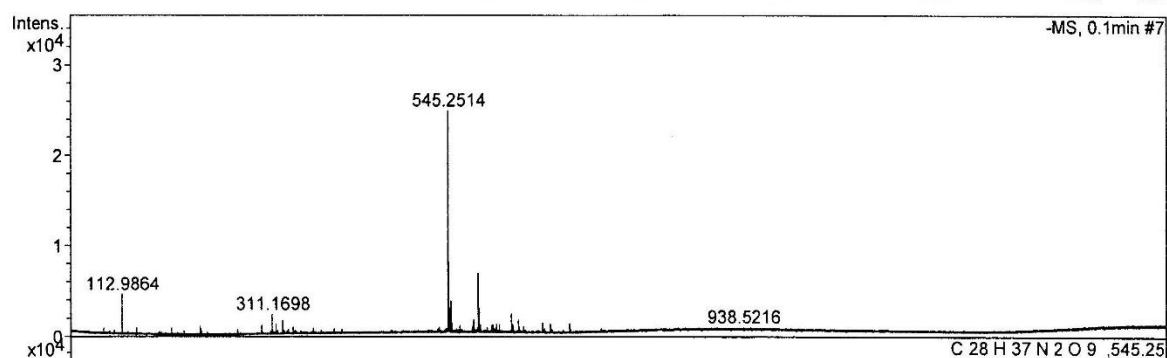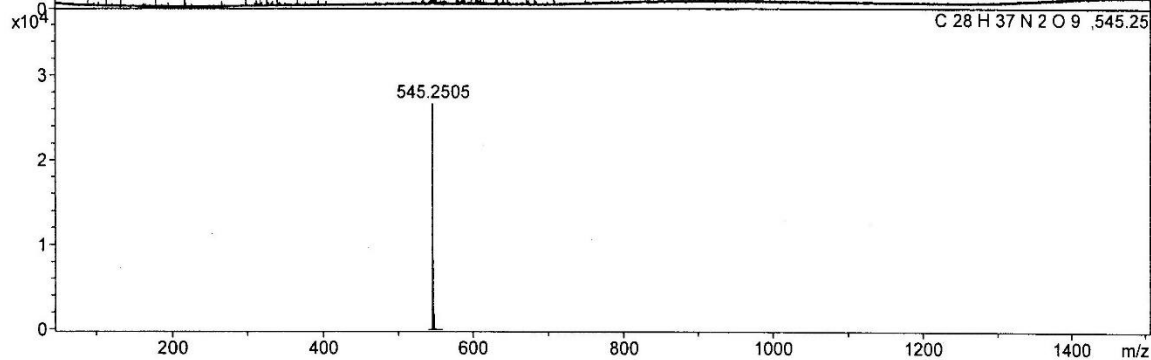

**Figure S15.** MS spectrum of compound (**3**)

**Acquisition Parameter**

|             |            |                      |          |                  |           |
|-------------|------------|----------------------|----------|------------------|-----------|
| Source Type | ESI        | Ion Polarity         | Positive | Set Nebulizer    | 0.3 Bar   |
| Focus       | Not active |                      |          | Set Dry Heater   | 150 ?C    |
| Scan Begin  | 50 m/z     | Set Capillary        | 4500 V   | Set Dry Gas      | 4.0 l/min |
| Scan End    | 3000 m/z   | Set End Plate Offset | -500 V   | Set Divert Valve | Source    |

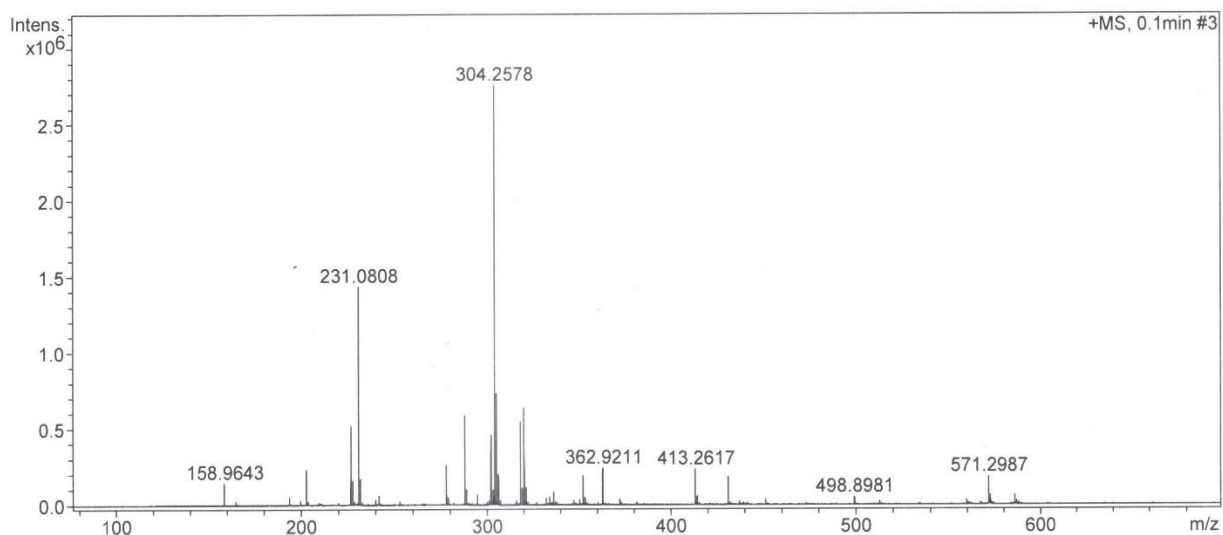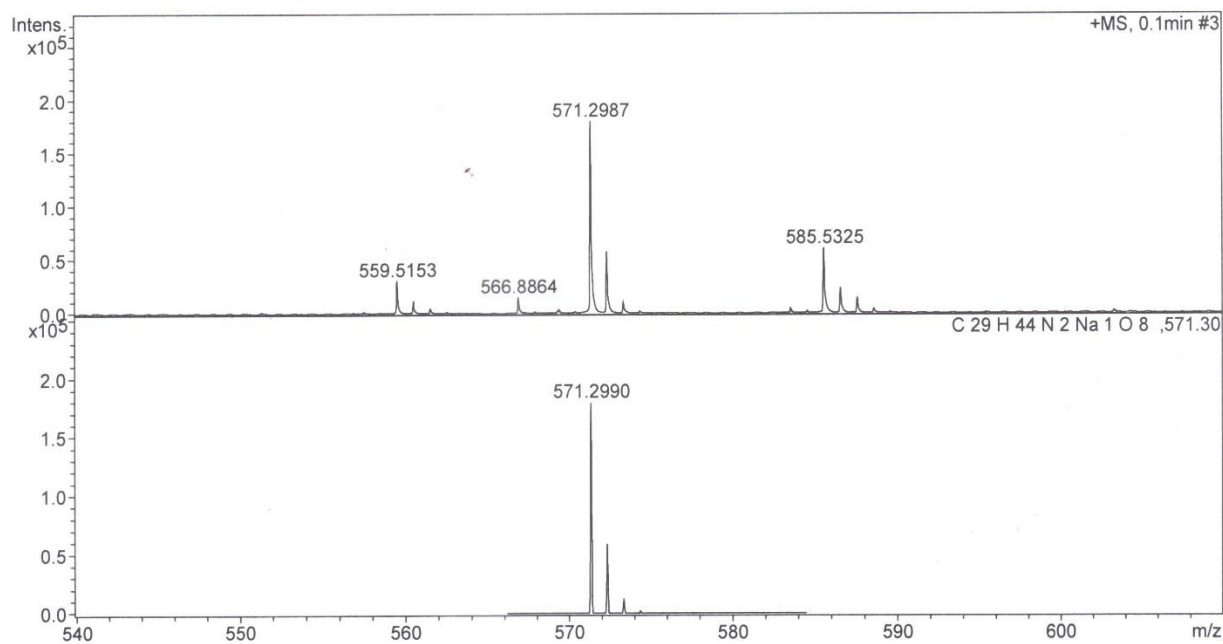

Figure S16. MS spectrum of compound (4)

| Acquisition Parameter |            |                      |          |                  |           |
|-----------------------|------------|----------------------|----------|------------------|-----------|
| Source Type           | ESI        | Ion Polarity         | Positive | Set Nebulizer    | 1.0 Bar   |
| Focus                 | Not active |                      |          | Set Dry Heater   | 150 °C    |
| Scan Begin            | 100 m/z    | Set Capillary        | 5000 V   | Set Dry Gas      | 4.0 l/min |
| Scan End              | 1500 m/z   | Set End Plate Offset | -500 V   | Set Divert Valve | Source    |

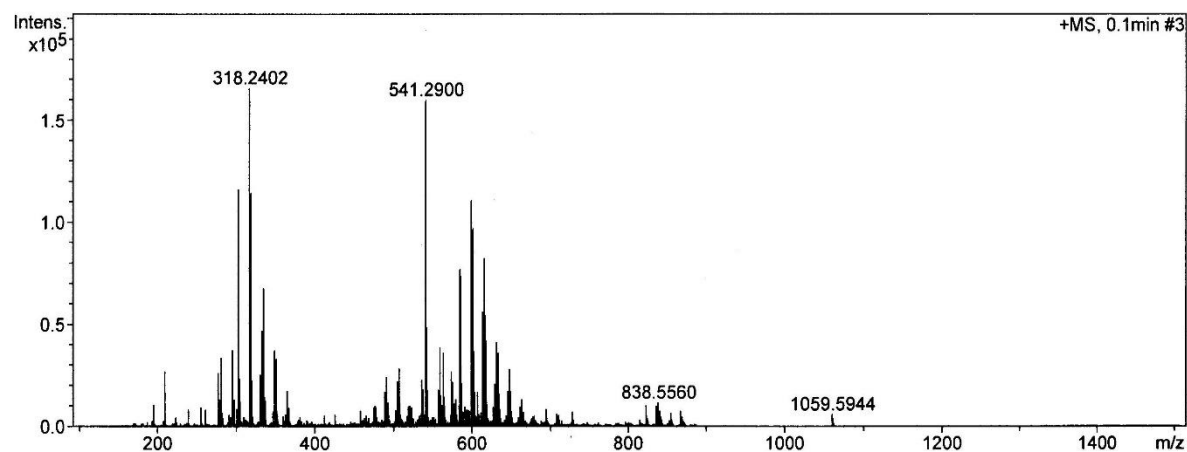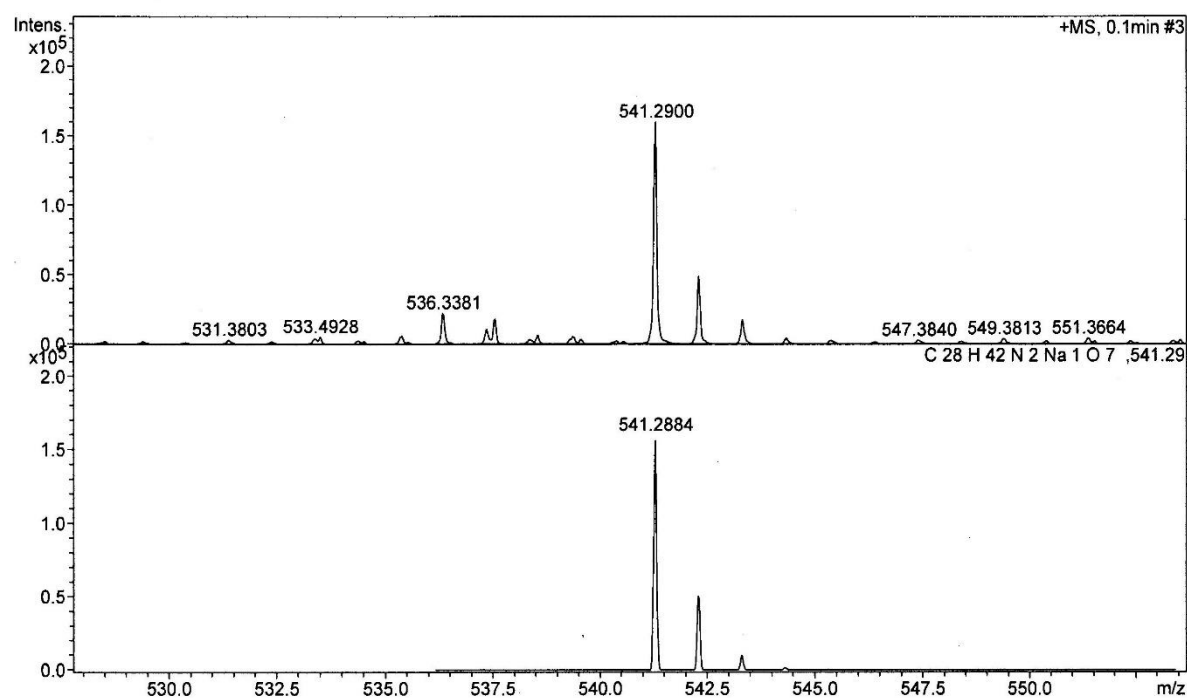



**Figure S17.** MS spectrum of compound (5)

| Acquisition Parameter |            |                      |          |                  |           |
|-----------------------|------------|----------------------|----------|------------------|-----------|
| Source Type           | ESI        | Ion Polarity         | Positive | Set Nebulizer    | 0.3 Bar   |
| Focus                 | Not active |                      |          | Set Dry Heater   | 150 °C    |
| Scan Begin            | 50 m/z     | Set Capillary        | 4500 V   | Set Dry Gas      | 4.0 l/min |
| Scan End              | 3000 m/z   | Set End Plate Offset | -500 V   | Set Divert Valve | Source    |

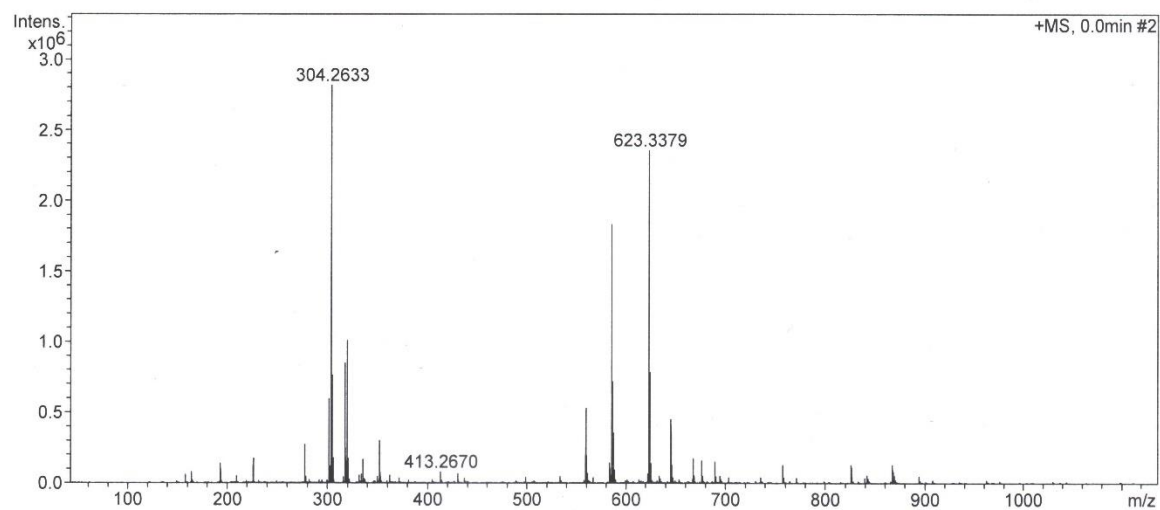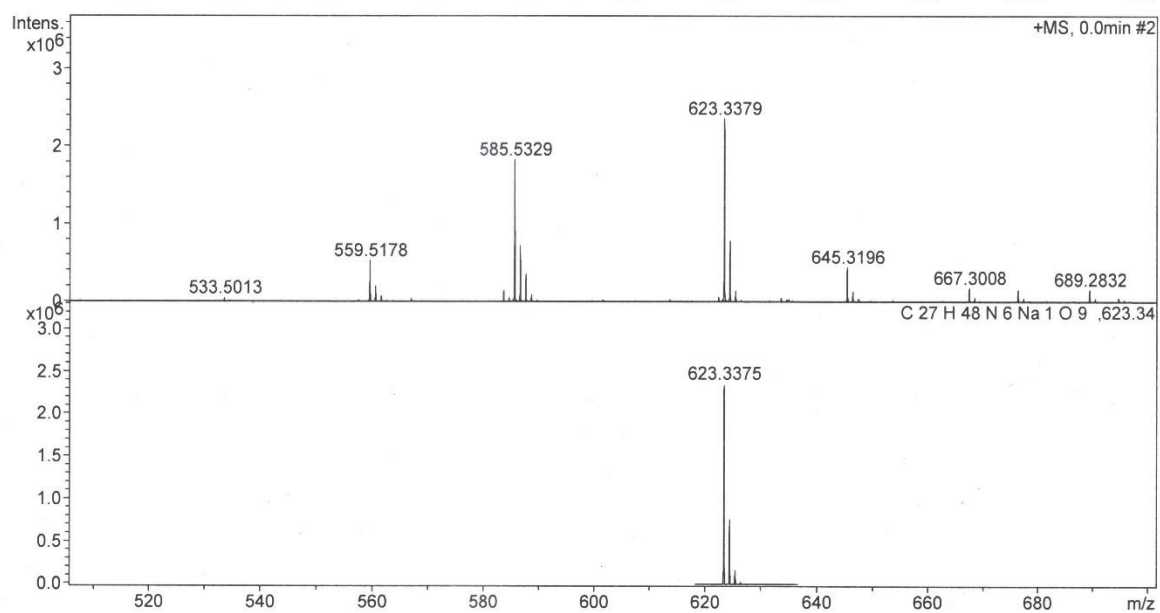

Figure S18. MS spectrum of compound (6)

| Acquisition Parameter |            |                      |          |                  |           |
|-----------------------|------------|----------------------|----------|------------------|-----------|
| Source Type           | ESI        | Ion Polarity         | Positive | Set Nebulizer    | 1.0 Bar   |
| Focus                 | Not active |                      |          | Set Dry Heater   | 150 ?C    |
| Scan Begin            | 100 m/z    | Set Capillary        | 5000 V   | Set Dry Gas      | 4.0 l/min |
| Scan End              | 1500 m/z   | Set End Plate Offset | -500 V   | Set Divert Valve | Source    |

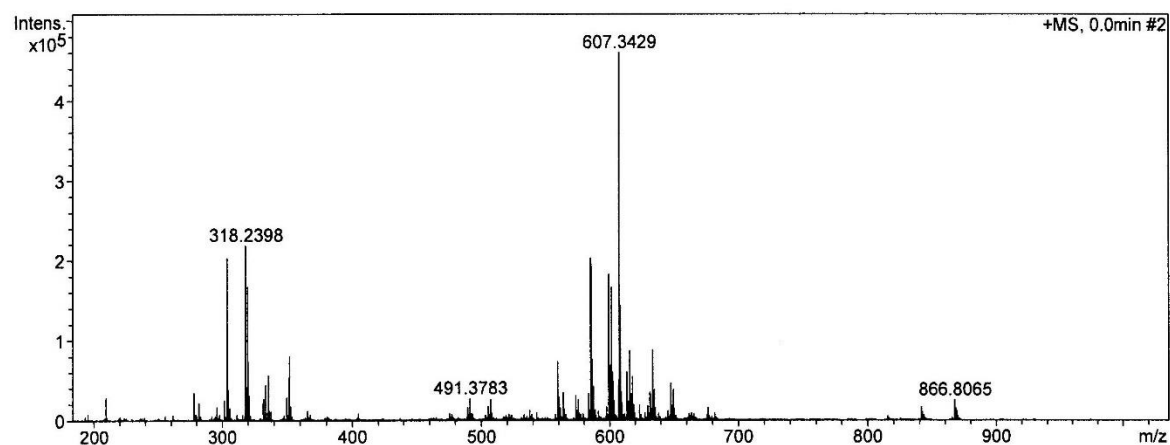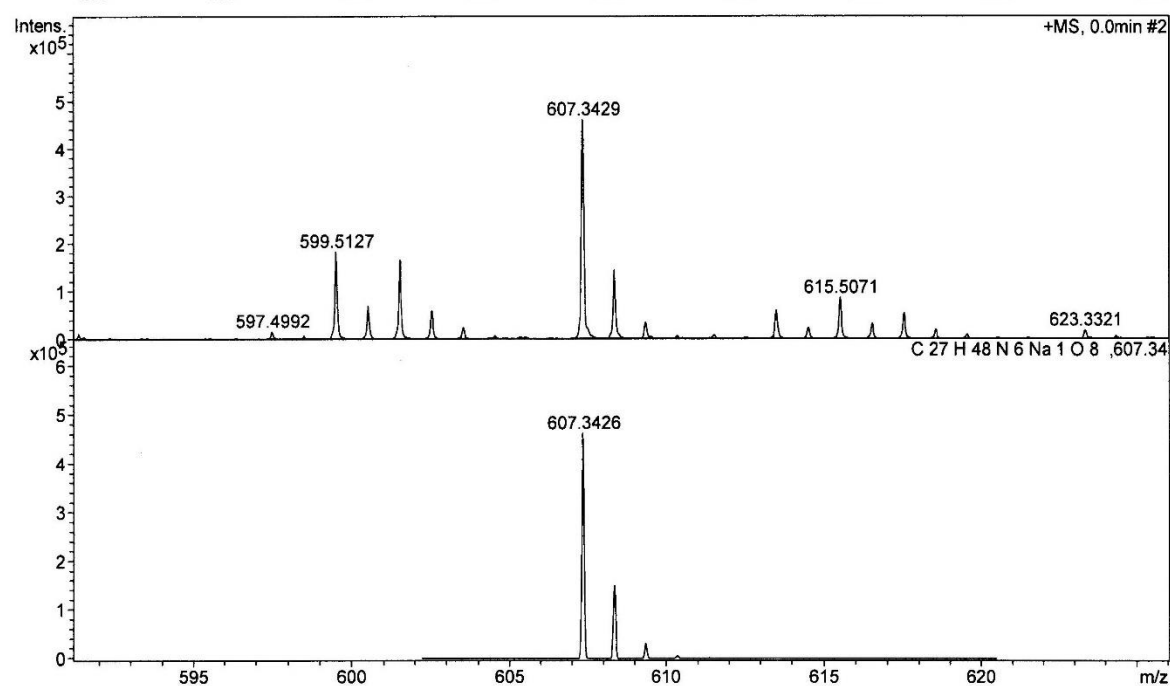

Supplement: s1 [file s1]
